# Supplementary material
Source: Springer Nature journal article supplement (https://www.springermedizin.de/resource/supplementary/13023_2012_508_MOESM2_ESM.pdf/9642730)

**A**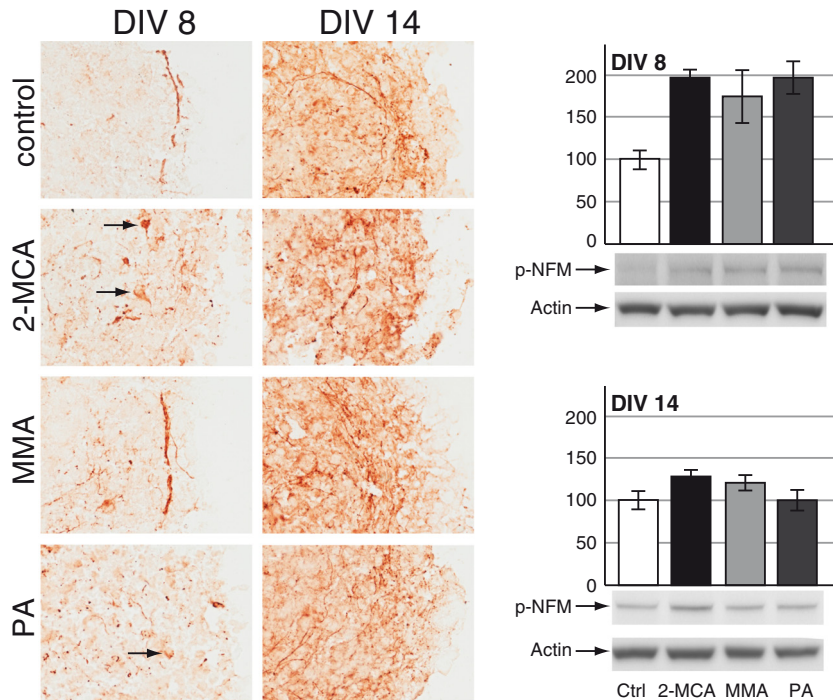**B**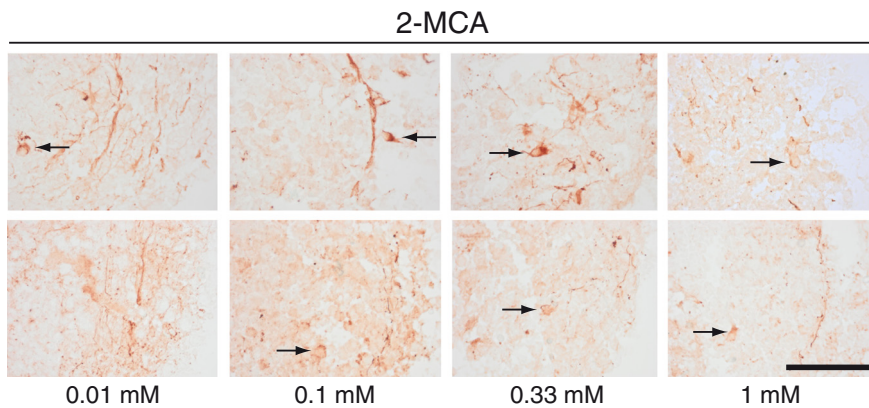

Supplement: MOESM2 [file 9642730]
